# Supplementary material for: Reduction of CO2with H2S in a simulated deep-sea hydrothermal vent system
Source: Royal Society of Chemistry journal article supplement (doi:10.1039/c8cc08075e), 2018-12-20
Supplement: c8cc08075e1.pdf [file c8cc08075e1.pdf]

## Supporting Information

### Reduction of CO<sub>2</sub> with H<sub>2</sub>S in simulated deep-sea hydrothermal vents system

Runtian He<sup>‡</sup>, Baoyun Hu<sup>§</sup>, Heng Zhong<sup>‡, ||</sup>, Fangming Jin<sup>‡, ||, \*</sup>, Junjie Fan<sup>§</sup>, Yun Hang Hu<sup>⊥</sup> and Zhenzi Jing<sup>\*</sup>

<sup>‡</sup>School of Environmental Science and Engineering, State Key Lab of Metal Matrix Composites, Shanghai Jiao Tong University, 800 Dongchuan Road, Shanghai 200240, P. R. China

<sup>§</sup> School of Materials Science & Engineering, Tongji University, 4800 Cao'an Road, Shanghai 201804, P. R. China

<sup>||</sup> Shanghai Institute of Pollution Control and Ecological Security, Shanghai 200092, China.

<sup>⊥</sup> Department of Materials Science and Engineering, Michigan Technological University, Houghton, Michigan, USA.

| Table of Contents                                                          | Pages      |
|----------------------------------------------------------------------------|------------|
| <b>1 Experimental</b>                                                      | <b>S2</b>  |
| Figure S1                                                                  | S2         |
| <b>2 Synthesis of metal sulphides</b>                                      | <b>S3</b>  |
| Figure S2                                                                  | S3         |
| Figure S3                                                                  | S4         |
| Figure S4                                                                  | S5         |
| Figure S5                                                                  | S6         |
| Figure S6                                                                  | S7         |
| Figure S7                                                                  | S8         |
| Figure S8                                                                  | S9         |
| Figure S9                                                                  | S10        |
| <b>3 Investigation on reduction of gaseous CO<sub>2</sub> into formate</b> | <b>S11</b> |
| Table S1                                                                   | S11        |
| Table S2                                                                   | S12        |
| Table S3                                                                   | S13        |
| Figure S10                                                                 | S14        |
| Table S4                                                                   | S15        |
| Figure S11                                                                 | S16        |
| Figure S12                                                                 | S17        |
| Figure S13                                                                 | S18        |
| Figure S14                                                                 | S19        |
| Figure S15                                                                 | S20        |
| Figure S16                                                                 | S21        |
| <b>References</b>                                                          | <b>S22</b> |
| <b>22pages (including the cover page)</b>                                  |            |
| <b>16 Figures</b>                                                          |            |
| <b>4 Tables</b>                                                            |            |

# 1 Experimental Procedures

## 1.1 Materials

$\text{Na}_2\text{S}\cdot 9\text{H}_2\text{O}$  was used as a source of  $\text{HS}^-$  and  $\text{NaHCO}_3$  as  $\text{CO}_2$  resource for experimental convenience in this study.  $\text{NaHCO}_3$  ( $\geq 99.5\%$ ) and  $\text{Na}_2\text{S}\cdot 9\text{H}_2\text{O}$  ( $\geq 99.8\%$ ) were purchased from Sino-pharm Chemical Reagent Co., Ltd, Deuterium oxide ( $\text{D}_2\text{O}$ , 99.9% D) from Cambridge Isotope Laboratories (Inc. USA), formate (for mass spectrometry, 98%) from Sigma-Aldrich (Shanghai) Trading Co., Ltd, Gaseous  $\text{N}_2$  ( $> 99.99\%$ ) from Shanghai Pujiang Special Gas Co., Ltd, Gaseous  $\text{H}_2$  ( $> 99.999\%$ ) and  $\text{CO}_2$  ( $> 99.99\%$ ) from Shanghai Poly-Gas Technology Co. Ltd, respectively. All of the raw materials used in the experiment were analytical grade without further purification. The solvent used in the experiment is distilled water.

## 1.2 Experimental section

The experiments were conducted in a SUS316 lined reactor with an internal volume of 42 mL. The certain amount of  $\text{NaHCO}_3$  ( $\text{CO}_2$  source),  $\text{Na}_2\text{S}\cdot 9\text{H}_2\text{O}$  (source of  $\text{HS}^-$ ) and degassed water (according to a certain water filling) were added into the SUS316 lined reactor first, and then the reactor was purged with nitrogen for 5 min. After that the reactor was put into an induced heating furnace and heated to a desired temperature with an increasing rate of  $15\text{ }^\circ\text{C}/\text{min}$ . The induced heating furnace was swayed of 20 times/min during the reaction. The water filling was defined as the volumetric ratio of the water put into the reactor to the inner volume of the reactor in the experiments. The reaction time was defined as the time started when the temperature reached to the desired temperature. After a desired reaction time, the reactor was removed from the furnace and cooled by electric fan. The detail of this reactor has been described in Jin's previous papers.<sup>1, 2</sup>

## 1.3 Product analysis

After filtered through a  $0.22\text{-}\mu\text{m}$ -filter film, liquid samples were analyzed by HPLC (High-performance Liquid Chromatography, Agilent Technologies 1260 Infinity) and GC-MS (Gas Chromatography-Mass spectroscopy, Agilent Technologies 7890) analyzer. HPLC was equipped with a Shodex RSpak KC-811 packing column ( $300\text{ mm}\times 8\text{ mm}$  i.d.) and a tunable UV detector (absorbance detector adjusted to 210 nm), and the flow rate of the eluent ( $2\text{ mmol/L HClO}_4\text{ aq.}$ ) is  $1.0\text{ mL}/\text{min}$ . GC-MS was analyzed with Agilent Technologies 5975C inert MSD with Tripe-Axis Detector (with 7890A GC system). The solid samples were washed by deionized water and ethanol separately, and then dried in an oven at  $80\text{ }^\circ\text{C}$  for 10 hours. The crystalline phases and morphology of the solid samples were characterized via X-ray powder diffraction (XRD, Shimadzu XRD-6100) and scanning electron microscope (SEM, S-4800). The XRD pattern was investigated with Cu  $\text{K}\alpha$  radiation ( $\lambda = 0.154056\text{ nm}$ ) and a scanning rate of  $4\text{ }^\circ/\text{min}$  at an acceleration voltage of 40 Kv and emission current of 40 mA.

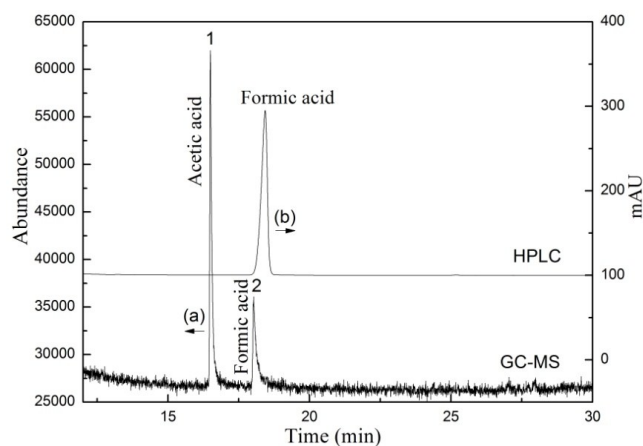

**Figure S1.** GC-MS and HPLC chromatogram of the liquid samples after reaction (T:  $300\text{ }^\circ\text{C}$ , t: 3 h,  $\text{NaHCO}_3$ :  $0.4\text{ mol/L}$ ,  $\text{Na}_2\text{S}\cdot 9\text{H}_2\text{O}$ :  $0.1\text{ mol/L}$ ,  $\text{Ni}_3\text{S}_2$ :  $0.05\text{ mol/L}$ , Water filling: 35%).

## 2 Synthesis of metal sulphides

The metal sulphides catalysts ( $\text{Ni}_3\text{S}_2$ ,  $\text{FeS}_2$ ,  $\text{CuS}$ ,  $\text{MoS}$  and  $\text{CoS}$ ) used in the experiment were prepared by solvothermal and hydrothermal method. In a typical synthesis process, 0.2 mol/L  $\text{Ni}(\text{NO}_3)_2 \cdot 6\text{H}_2\text{O}$ , 0.2 mol/L  $(\text{H}_2\text{N})_2\text{CS}$  and 18 mL ethylene glycol were added to a 30ml Teflon-lined autoclave with the filling ratio of 60% at room temperature. After heating at 200 °C for 24 h, reaction vessel was cooled to room temperature is air. Black precipitates were collected by filtration, and washed by deionized water and anhydrous ethanol for several times, respectively. Finally, the as-prepared powders were dried at 60°C in air for 8h and then used as the  $\text{CO}_2$  reduction catalyst. The preparation of  $\text{FeS}_2$ ,  $\text{CuS}$ ,  $\text{MoS}_2$ ,  $\text{MnS}$ ,  $\text{CdS}$  and  $\text{CoS}$  were performed by the partial substitution of an appropriate ratio of  $(\text{H}_2\text{N})_2\text{CS}$  with  $\text{FeCl}_2 \cdot 6\text{H}_2\text{O}$ ,  $\text{Cu}(\text{NO}_3)_2 \cdot 4\text{H}_2\text{O}$ ,  $\text{Na}_2\text{MoO}_4 \cdot 2\text{H}_2\text{O}$ ,  $\text{MnSO}_4 \cdot \text{H}_2\text{O}$ ,  $\text{Cd}(\text{NO}_3)_2 \cdot 4\text{H}_2\text{O}$  or  $\text{CoCl}_2 \cdot 6\text{H}_2\text{O}$ , respectively. All chemicals were purchased from Sino-pharm Chemical Reagent Co., Ltd and used without further purification. XRD patterns of obtained  $\text{Ni}_3\text{S}_2$ ,  $\text{FeS}_2$ ,  $\text{CuS}$ ,  $\text{MoS}_2$ ,  $\text{MnS}$ ,  $\text{CdS}$  and  $\text{CoS}$  are shown in Fig. S2, S3, S4, S5, S6, S7 and S8, respectively.

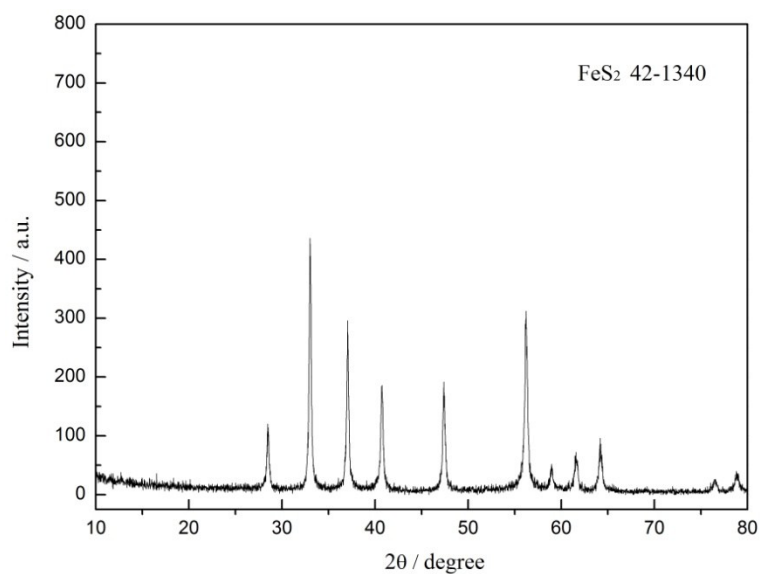

Figure S2. XRD pattern of obtained  $\text{FeS}_2$ .

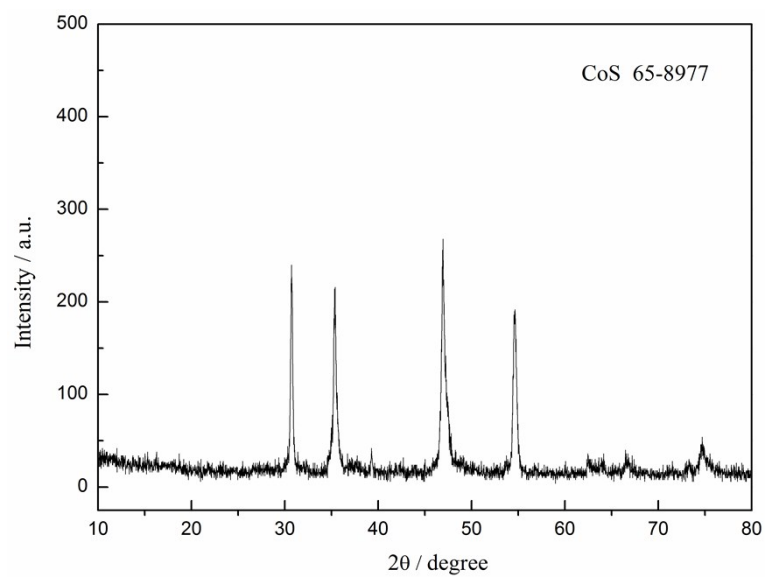

Figure S3. XRD pattern of obtained CoS.

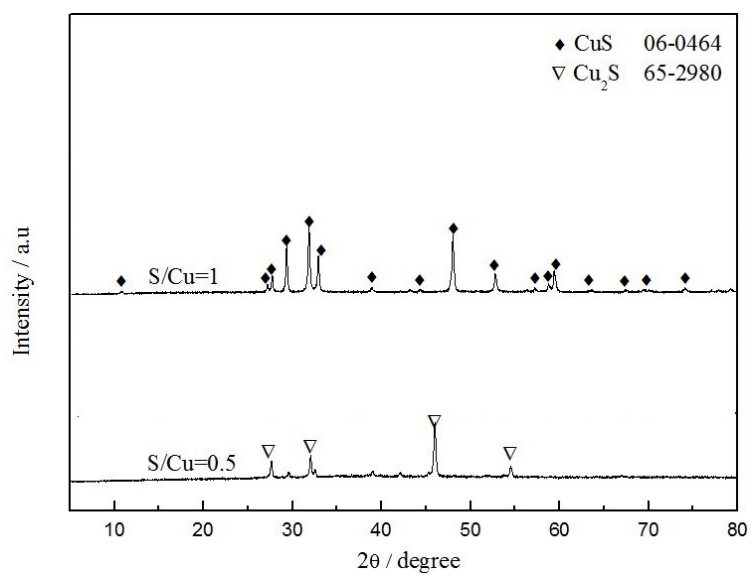

Figure S4. XRD pattern of obtained Cu<sub>2</sub>S and CuS.

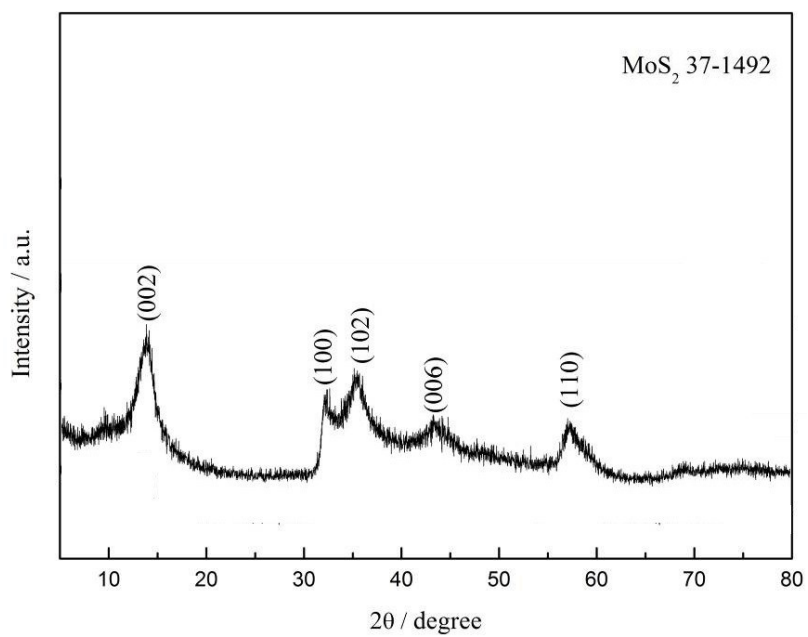

Figure S5. XRD pattern of obtained MoS<sub>2</sub>.

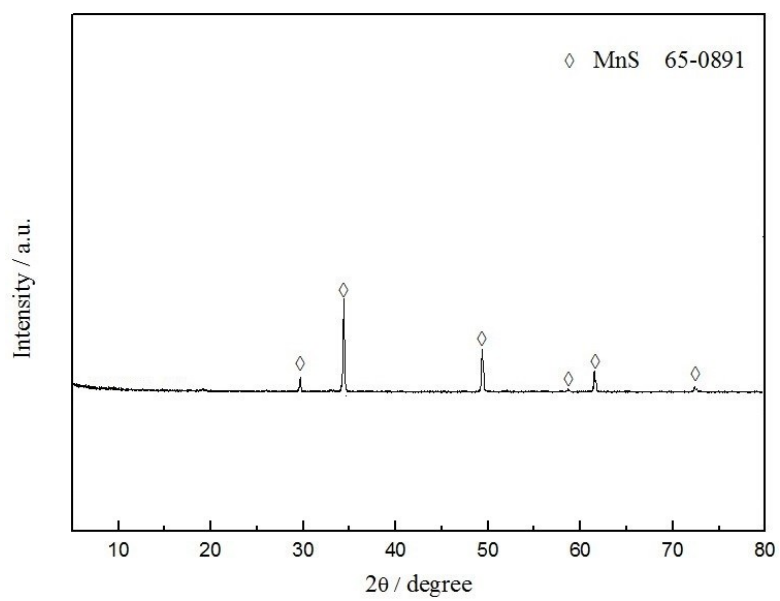

Figure S6. XRD pattern of the obtained MnS.

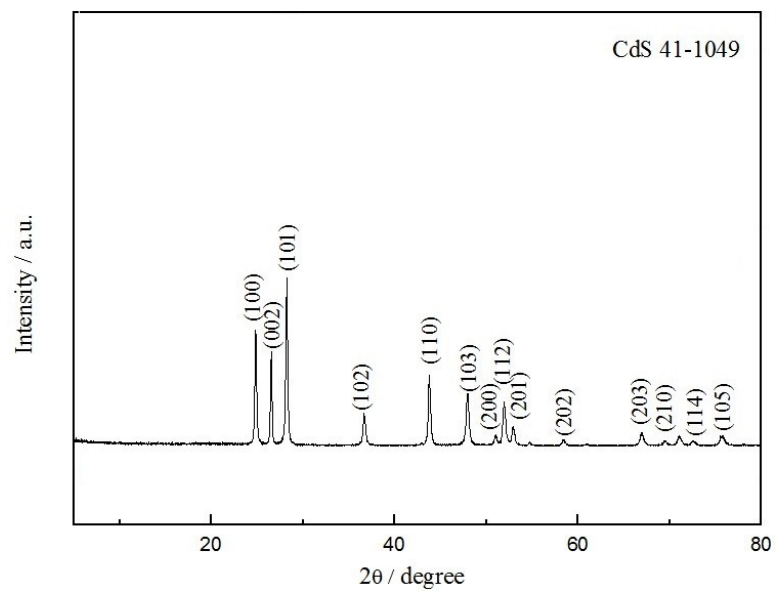

Figure S7. XRD pattern of obtained CdS.



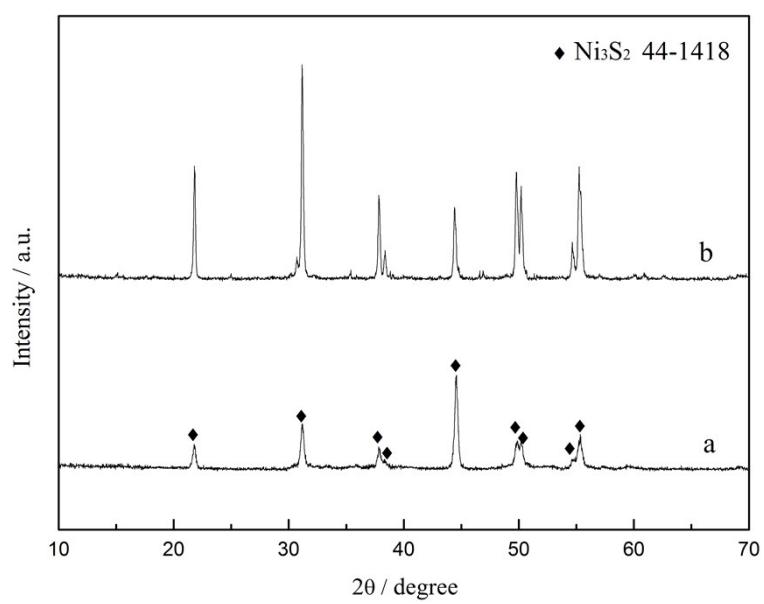

**Figure S8.** XRD patterns of  $\text{Ni}_3\text{S}_2$  before (a) and after (b) hydrothermal reactions.

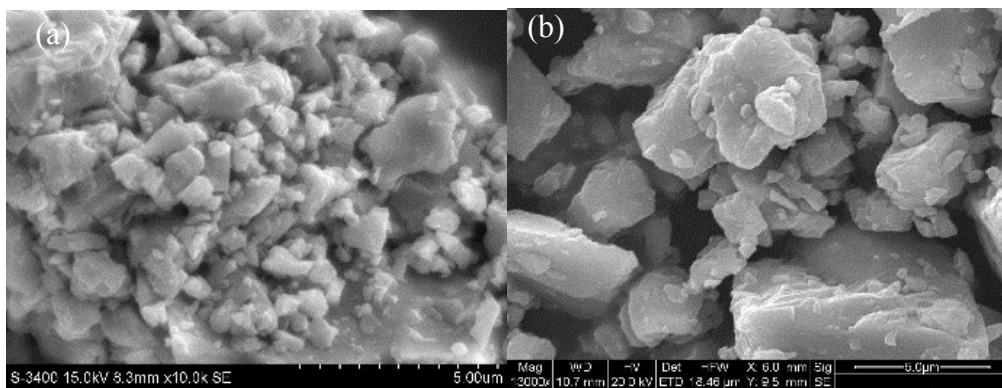

**Figure S9.** SEM pictures of  $\text{Ni}_3\text{S}_2$  synthesized by solvothermal(a) and hydrothermal(b) reactions.

### 3 Investigation on reduction of gaseous CO<sub>2</sub> into formate

After the investigation on the reduction of CO<sub>2</sub> with NaHCO<sub>3</sub> as a CO<sub>2</sub> source, further research with gaseous CO<sub>2</sub> were conducted so as to know whether the formation of the formate can also be achieved with the gaseous CO<sub>2</sub>. Formate obtained with different amounts of gaseous CO<sub>2</sub> is shown in Table S1. The formate yield was few (65 mg/L) when 0.5 MPa CO<sub>2</sub> was injected into the autoclave for reduction (Table S2, Entry 1), however with increasing gaseous CO<sub>2</sub> into 1.0 and 2.0 MPa (Table S2, Entry 2 and Entry 3), the formate yields of 327 and 675 mg/L were produced, respectively, suggesting that the formation of formate depended on the amount of CO<sub>2</sub>, and the more the gaseous CO<sub>2</sub> used, the more the formate formed. As discussed previously, the formate may be formed via HCO<sub>3</sub><sup>-</sup> rather than CO<sub>2</sub>,<sup>3, 4</sup> and a mildly alkaline pH was favorable to formate formation. When pumping plenitudinous CO<sub>2</sub> into alkaline solution, the reaction occurs as shown in Eq.1, while a deficient injection of CO<sub>2</sub>, Eq.2 can be obtained. The low yield of formate achieved by a small gaseous CO<sub>2</sub> injected (Table S2, Entry 1) is likely that CO<sub>3</sub><sup>2-</sup> is the main existing ions which results in a small yield of formate. With increasing the initial amount, plenitudinous gaseous CO<sub>2</sub> should be solved easily in alkaline solution to form more HCO<sub>3</sub><sup>-</sup> in water, and the more HCO<sub>3</sub><sup>-</sup> in turn leads to more formate formation (Table S2, Entry 2 and Entry 3). In order to further enhance the solubility of CO<sub>2</sub> in the alkaline solution, the solution with 2.0 MPa CO<sub>2</sub> injected (Table S2, Entry 4) was heated at 80°C for 3 h, and after the hydrothermal reaction, the yield of formate was found to reach up to 1079 mg/L. Although the yield is still not as high as the one obtained with NaHCO<sub>3</sub>, from discussed above, we can draw the conclusion that gaseous CO<sub>2</sub> can be directly reduced into the formate with the Na<sub>2</sub>S•9H<sub>2</sub>O addition.

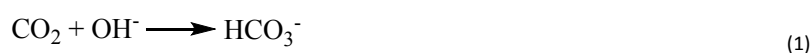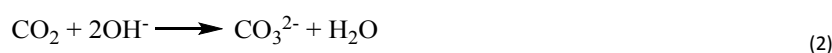

**Table S1.** Reduction of CO<sub>2</sub> with H<sub>2</sub>S in different reactors

| Entry            | Reactor | T/°C | Time/h | catalyst                       | Formate (mg/L) |
|------------------|---------|------|--------|--------------------------------|----------------|
| 1                | Teflon  | 250  | 24     | None                           | 0              |
| 2                | Teflon  | 250  | 24     | Ni <sub>3</sub> S <sub>2</sub> | 281            |
| 3 <sup>[a]</sup> | Teflon  | 250  | 24     | Ni <sub>3</sub> S <sub>2</sub> | 0              |
| 4                | quartz  | 300  | 2      | None                           | 0              |
| 5                | quartz  | 300  | 2      | Ni <sub>3</sub> S <sub>2</sub> | 2093           |
| 6 <sup>[b]</sup> | SUS316  | 300  | 3      | None                           | 24             |
| 7 <sup>[c]</sup> | SUS316  | 300  | 3      | Ni <sub>3</sub> S <sub>2</sub> | 5986           |

Na<sub>2</sub>S•9H<sub>2</sub>O: 0.025 mol/L; NaHCO<sub>3</sub>: 1 mol/L; Water filling:55%; [a] No NaHCO<sub>3</sub> ; [b][c] No Na<sub>2</sub>S•9H<sub>2</sub>O H<sub>2</sub>: 1MPa; NaHCO<sub>3</sub>: 0.4 mol/L; Water filling: 35%

**Table S2.** Yields of formate with gaseous CO<sub>2</sub> (T: 300 °C, t: 3 h, Water filling: 55%).

| Entry | CO <sub>2</sub><br>(MPa) | Na <sub>2</sub> S·9H <sub>2</sub> O<br>(mol/L) | H <sub>2</sub> O<br>mL | Ni <sub>3</sub> S <sub>2</sub><br>(mol/L) | Fomic acid<br>Yield<br>(mg/L) |
|-------|--------------------------|------------------------------------------------|------------------------|-------------------------------------------|-------------------------------|
| 1     | 0.5                      | 0.2                                            | 23.1                   | 0.1                                       | 65 <sup>a</sup>               |
| 2     | 1.0                      | 0.2                                            | 23.1                   | 0.1                                       | 327 <sup>a</sup>              |
| 3     | 2.0                      | 0.2                                            | 23.1                   | 0.1                                       | 675 <sup>a</sup>              |
| 4     | 2.0                      | 0.2                                            | 23.1                   | 0.1                                       | 1079 <sup>b</sup>             |

[a] at room temperature.[b] The solution with gaseous CO<sub>2</sub> was maintained for 3 h at 80°C before the hydrothermal reaction.

**Table S3.** Reduction of CO<sub>2</sub> to formate with H<sub>2</sub>S using different metal sulphides as catalysts

| Entry | Cat                            | Formate (mg/L) | Entry | Cat               | Formate (mg/L) |
|-------|--------------------------------|----------------|-------|-------------------|----------------|
| 1     | Ni <sub>3</sub> S <sub>2</sub> | 3477           | 7     | MoS <sub>2</sub>  | 2916           |
| 2     | CoS                            | 2456           | 8     | CdS               | 3455           |
| 3     | CoS <sub>2</sub>               | 2337           | 9     | Cu <sub>2</sub> S | 2535           |
| 4     | FeS <sub>2</sub> (Marcasite)   | 1651           | 10    | CuS               | 616            |
| 5     | FeS <sub>2</sub> (Pyrite)      | 3026           | 11    | ZnS               | 584            |
| 6     | MnS                            | 2659           |       |                   |                |

Catalyst: 0.1mol/L; Temp: 300 °C; time: 3 h; Na<sub>2</sub>S•9 H<sub>2</sub>O: 0.025 mol/L; Water filling: 55%; NaHCO<sub>3</sub>: 1.4 mol/L; Catalysts were synthesized by hydrothermal or solvothermal methods.

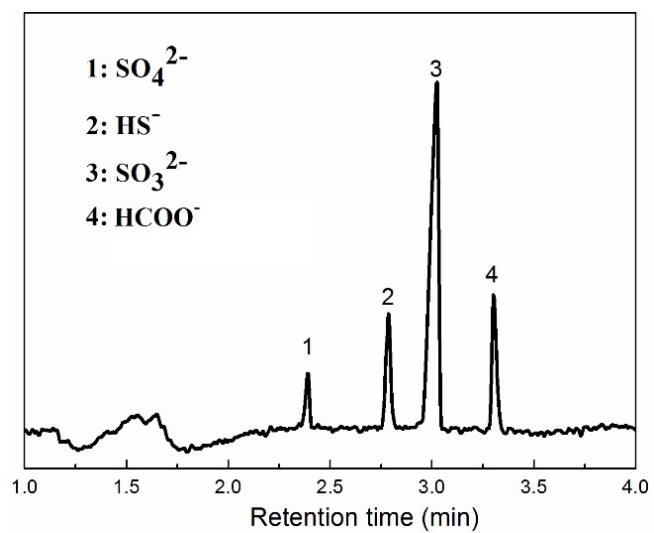

Figure S10. Typical capillary electropherograms of liquid samples after the reaction.

**Table S4.** Yield of  $\text{SO}_4^{2-}$  and  $\text{SO}_3^{2-}$  produced from  $\text{H}_2\text{S}$

| Ion <sup>[a]</sup> | Concentration <sup>[b]</sup><br>(mmol/L) | Ion             | Concentration<br>(mmol/L) |
|--------------------|------------------------------------------|-----------------|---------------------------|
| $\text{SO}_4^{2-}$ | 4.38                                     | $\text{S}^{2-}$ | 0.74                      |
| $\text{SO}_3^{2-}$ | 19.26                                    | $\text{HCOO}^-$ | 75.44                     |

[a] Reaction Condition:  $\text{Ni}_2\text{S}_3$ : 0.1mol/L; Temp: 300 °C; time: 3 h;  $\text{Na}_2\text{S}\cdot 9\text{H}_2\text{O}$ : 0.025 mol/L; Water filling: 55%;  $\text{NaHCO}_3$ : 1.4 mol/L. [b] Sample were measured by a Thermo Scientific Dionex ICS-5000+/900 Ion Chromatography with Ionpac AS11-HC Analytical Column.

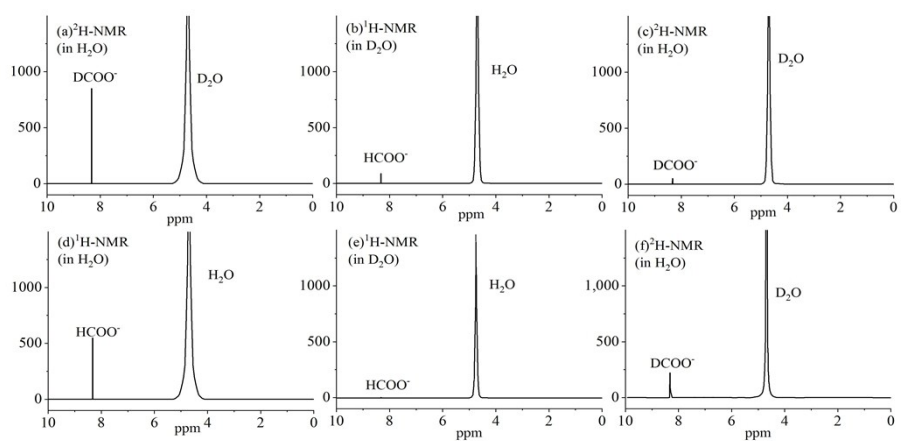

**Figure. S11**  $^1\text{H}$ - and  $^2\text{H}$ -NMR spectra of the solutions after the hydrothermal reduction of  $\text{CO}_2$  with HS- or  $\text{H}_2\text{S}$  in  $\text{D}_2\text{O}$  (or with  $\text{DS}^-$  in  $\text{H}_2\text{O}$ ) (T: 300 °C, t: 3 h,  $\text{NaHCO}_3$ : 1.4 mol/L,  $\text{Ni}_3\text{S}_2$ : 0.1 mol/L, Water filling: 55%).



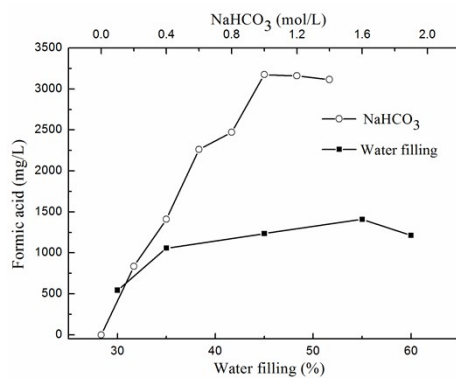

**Figure S12.** Effect of water filling and NaHCO<sub>3</sub> concentration on the formate production (T: 300 °C; t: 3 h; Na<sub>2</sub>S•9 H<sub>2</sub>O: 0.2 mol/L; Ni<sub>3</sub>S<sub>2</sub>: 0.05 mol/L; 0.4 mol/L NaHCO<sub>3</sub> for water filling; 55% water filling for NaHCO<sub>3</sub>).

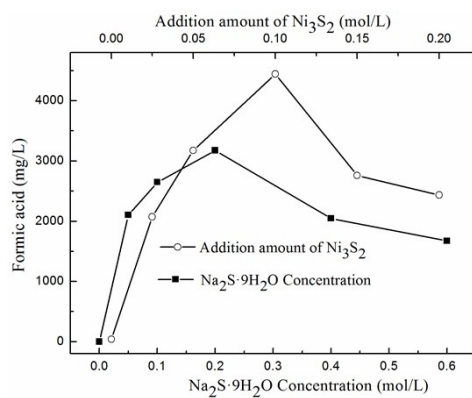

**Figure S13.** Effects of Na<sub>2</sub>S·9H<sub>2</sub>O concentration and addition amount of Ni<sub>3</sub>S<sub>2</sub> on the formate production (T: 300 °C; t: 3 h; water filling: 55%; NaHCO<sub>3</sub>: 1.0 mol/L; 0.05 mol/L Ni<sub>3</sub>S<sub>2</sub> for Na<sub>2</sub>S·9H<sub>2</sub>O; 0.2 mol/L Na<sub>2</sub>S·9H<sub>2</sub>O for Ni<sub>3</sub>S<sub>2</sub>).

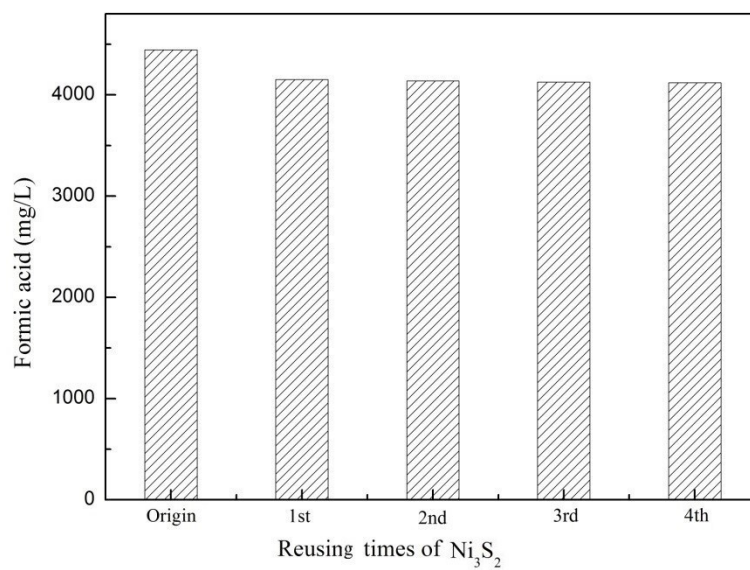

**Figure S14.** Effect of reused  $\text{Ni}_3\text{S}_2$  on the formate yield (T: 300 °C; t: 3 h;  $\text{NaHCO}_3$ : 1.0 mol/L;  $\text{Na}_2\text{S} \cdot 9 \text{H}_2\text{O}$ : 0.2 mol/L;  $\text{Ni}_3\text{S}_2$ : 0.1 mol/L).

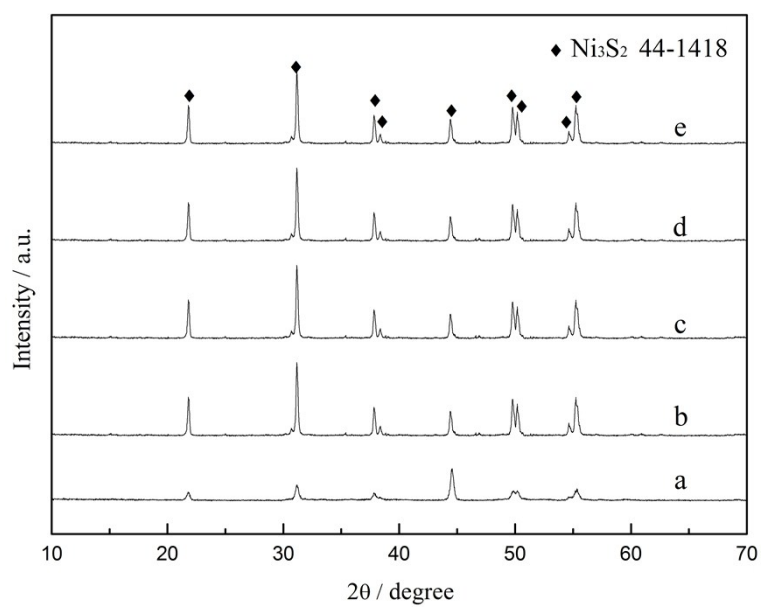

**Figure S15.** XRD patterns of (a) the original  $\text{Ni}_3\text{S}_2$ ,  $\text{Ni}_3\text{S}_2$  recycled after (b) 1<sup>st</sup>, (c) 2<sup>nd</sup>, (d) 3<sup>rd</sup> and (e) 4<sup>th</sup> times.

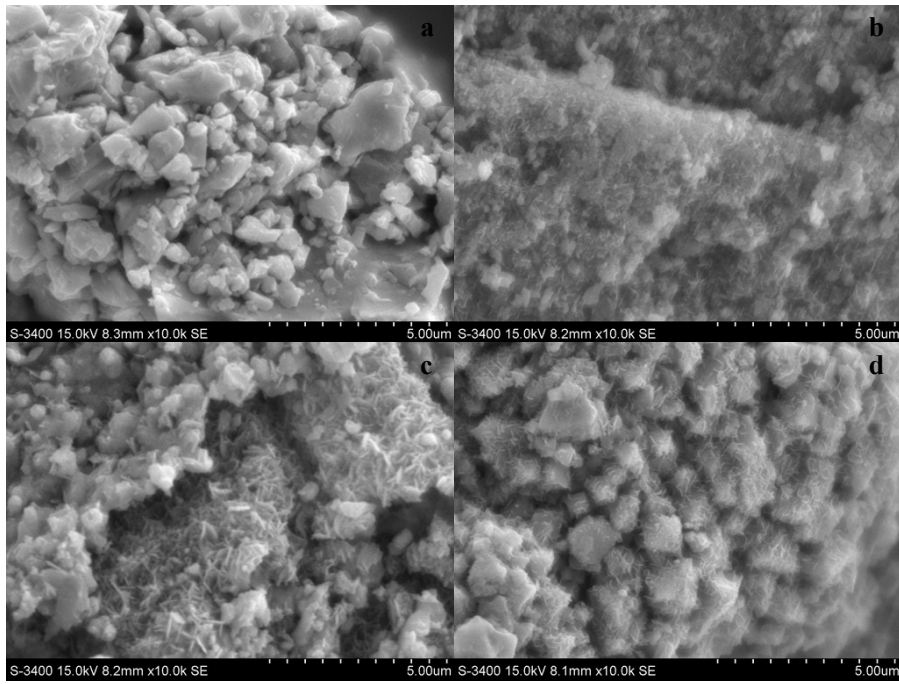

**Figure S16.** SEM images of (a) the original  $\text{Ni}_3\text{S}_2$ ,  $\text{Ni}_3\text{S}_2$  recycled after (b) 1st, (c) 2nd, (d) 3rd times.

## References

- 1 Kishida H., Jin F. M., Zhou Z. Y, Moriya T., Enomoto H. *Chemistry Letters*, 2005, **34**, 1560-1561.
- 2 Kishita A, Takahashi S.; Jin F, Yamasaki Y, Moriya T. Enomoto H. *J. Jpn. Petrol. Inst.*, 2005, **48**, 272-280.
- 3 Lyu, L. Y.; Zeng, X.; Yun, J.; Wei, F.; and Jin, F. M. *Environ .Sci. Technol.*, 2014, **48**, 6003-6009.
- 4 Jin, F. M.;; Zeng, X.; Liu, J. k.; Jin, Y. j.; Wang, L.Y.; Zhong, H.; Yao, G.D.; Huo, Z. B. *Sci. Rep.*, 2014, **4**, 4503.
